# Supplementary material for: Contamination Assessment and Temporal Evolution of Nitrates in the Shallow Aquifer of the Metauro River Plain (Adriatic Sea, Italy) after Remediation Actions
Source: MDPI journal article supplement (doi:10.3390/ijerph191912231), 2022-09-27
Supplement: s1 [file s1]

# Contamination assessment and temporal evolution of nitrates in the shallow aquifer of the Metauro River plain (Adriatic Sea, Italy) after remediation actions

Marco Taussi <sup>1,\*</sup>, Caterina Gozzi <sup>2</sup>, Orlando Vaselli <sup>2,3</sup>, Jacopo Cabassi <sup>3</sup>, Matia Menichini <sup>4</sup>, Marco Doveri <sup>4</sup>, Marco Romei <sup>5</sup>, Alfredo Ferretti <sup>5</sup>, Alma Gambioli <sup>5</sup>, Barbara Nisi <sup>3</sup>

- <sup>1</sup> Dipartimento di Scienze Pure e Applicate, Università degli Studi di Urbino Carlo Bo, Via Ca' Le Suore 2/4, Urbino, Italy  
<sup>2</sup> Dipartimento di Scienze della Terra, Università di Firenze, Via G. La Pira 4, Firenze, Italy  
<sup>3</sup> CNR-IGG Istituto di Geoscienze e Georisorse, Consiglio Nazionale delle Ricerche, Via G. La Pira 4, Firenze, Italy  
<sup>4</sup> CNR-IGG Istituto di Geoscienze e Georisorse, Consiglio Nazionale delle Ricerche, Via G. Moruzzi 1, Pisa, Italy  
<sup>5</sup> ASET SpA, Via Luigi Einaudi 1, 61032 Fano, Italy;  
\* Correspondence: marco.taussi@uniurb.it

Below are reported the tables and the boxplots with the main statistical parameters of the physico-chemical composition and the nitrate contents for each investigated well.

Table S1: main statistical parameters of compositional data for each well.

| Well #1 (ARA)    |        |      |      |        |        |      |
|------------------|--------|------|------|--------|--------|------|
| Parameter        | N. Obs | Min  | Max  | Mean   | Median | SD   |
| HCO <sub>3</sub> | 11     | 189  | 312  | 272    | 283    | 42.7 |
| Cl               | 11     | 32.8 | 68   | 46.2   | 48     | 11.7 |
| NO <sub>3</sub>  | 11     | 6.5  | 66   | 22.8   | 18     | 18.7 |
| SO <sub>4</sub>  | 11     | 71.7 | 103  | 81.6   | 74.7   | 10.3 |
| Na               | 11     | 28   | 50   | 34.2   | 34     | 6.17 |
| NH <sub>4</sub>  | 2      | 0.4  | 19   | 9.7    | 9.7    | 13.2 |
| K                | 11     | 2.8  | 4    | 3.18   | 3.1    | 0.37 |
| Mg               | 11     | 16.6 | 23   | 18.65  | 18.1   | 2.12 |
| Ca               | 11     | 84.2 | 126  | 94.54  | 91     | 12.7 |
| SiO <sub>2</sub> | 1      | 13   | 13   | -      | -      | -    |
| pH               | 11     | 7.26 | 8.12 | 7.62   | 7.58   | 0.28 |
| TDS              | 11     | 509  | 695  | 575    | 570    | 58.4 |
| EC               | 11     | 597  | 834  | 670    | 649    | 71.4 |
| Well #2 (ARA)    |        |      |      |        |        |      |
| Parameter        | N. Obs | Min  | Max  | Mean   | Median | SD   |
| HCO <sub>3</sub> | 12     | 195  | 345  | 277    | 278    | 37.7 |
| Cl               | 12     | 30.6 | 65   | 44.9   | 43.3   | 12.7 |
| NO <sub>3</sub>  | 12     | 5    | 71   | 19.9   | 16.8   | 17.7 |
| SO <sub>4</sub>  | 12     | 68.7 | 106  | 83.5   | 85.5   | 11.9 |
| Na               | 12     | 26.8 | 52   | 33.7   | 33.2   | 6.7  |
| K                | 12     | 2.4  | 3.7  | 2.89   | 2.85   | 0.36 |
| Mg               | 12     | 16.9 | 23   | 18.5   | 17.9   | 1.9  |
| Ca               | 12     | 81.8 | 128  | 93.2   | 88.7   | 12.4 |
| SiO <sub>2</sub> | 2      | 8    | 11   | 9.5    | 9.5    | 2.12 |
| pH               | 12     | 7    | 7.9  | 7.55   | 7.56   | 0.24 |
| TDS              | 12     | 516  | 744  | 574    | 564    | 61.2 |
| EC               | 12     | 582  | 844  | 661.75 | 655    | 68.6 |

| Well #3 (ARA) |
|---------------|
|---------------|

| <i>Parameter</i>     | <i>N. Obs</i> | <i>Min</i> | <i>Max</i> | <i>Mean</i> | <i>Median</i> | <i>SD</i> |
|----------------------|---------------|------------|------------|-------------|---------------|-----------|
| HCO <sub>3</sub>     | 12            | 146        | 344        | 275         | 280           | 50.1      |
| Cl                   | 12            | 33.1       | 66         | 47          | 44.4          | 11.5      |
| NO <sub>3</sub>      | 12            | 6.4        | 79         | 24.8        | 16.4          | 21.9      |
| SO <sub>4</sub>      | 12            | 73.6       | 137        | 88.4        | 83.6          | 18.2      |
| Na                   | 12            | 28         | 51         | 34          | 33.4          | 6         |
| K                    | 12            | 2.5        | 3.5        | 3.02        | 3             | 0.32      |
| Mg                   | 12            | 16.6       | 22.4       | 18.6        | 18            | 1.88      |
| Ca                   | 12            | 73         | 129        | 94.8        | 91.4          | 15.32     |
| SiO <sub>2</sub>     | 2             | 9          | 13         | 11          | 11            | 2.83      |
| pH                   | 12            | 7          | 8          | 7.56        | 7.57          | 0.29      |
| TDS                  | 12            | 469        | 801        | 585         | 555           | 86.51     |
| EC                   | 12            | 592        | 852        | 672         | 649           | 74.7      |
| <b>Well #4 (ARA)</b> |               |            |            |             |               |           |
| <i>Parameter</i>     | <i>N. Obs</i> | <i>Min</i> | <i>Max</i> | <i>Mean</i> | <i>Median</i> | <i>SD</i> |
| HCO <sub>3</sub>     | 12            | 176        | 376        | 276         | 276           | 44.35     |
| Cl                   | 12            | 33.2       | 60.8       | 45.6        | 43.2          | 9.97      |
| NO <sub>3</sub>      | 12            | 7.5        | 84         | 18.5        | 12.3          | 21.1      |
| SO <sub>4</sub>      | 12            | 75.3       | 132        | 86.7        | 83.3          | 15.2      |
| Na                   | 12            | 26.7       | 46         | 33.8        | 33.6          | 4.76      |
| K                    | 12            | 2.31       | 4          | 2.95        | 3             | 0.45      |
| Mg                   | 12            | 15.3       | 23         | 17.6        | 17.2          | 2.05      |
| Ca                   | 12            | 78         | 135        | 93          | 88.7          | 14.3      |
| SiO <sub>2</sub>     | 2             | 9          | 14         | 11.5        | 11.5          | 3.54      |
| pH                   | 12            | 7          | 8.01       | 7.59        | 7.57          | 0.28      |
| TDS                  | 12            | 480        | 848        | 574         | 554           | 90.4      |
| EC                   | 12            | 586        | 885        | 658         | 639           | 77.3      |
| <b>Well #5 (ARA)</b> |               |            |            |             |               |           |
| <i>Parameter</i>     | <i>N. Obs</i> | <i>Min</i> | <i>Max</i> | <i>Mean</i> | <i>Median</i> | <i>SD</i> |
| HCO <sub>3</sub>     | 12            | 198        | 388        | 281         | 275           | 41.8      |
| Cl                   | 12            | 35.5       | 62         | 46.5        | 46.4          | 8.51      |
| NO <sub>3</sub>      | 11            | 8.5        | 77         | 20.9        | 14.2          | 19.4      |
| SO <sub>4</sub>      | 12            | 71.2       | 100        | 81.3        | 80            | 7.53      |
| Na                   | 12            | 29.4       | 47         | 34.5        | 33.9          | 4.55      |
| K                    | 12            | 2.16       | 3.2        | 2.86        | 2.9           | 0.25      |
| Mg                   | 12            | 14.6       | 24         | 17.7        | 16.9          | 2.36      |
| Ca                   | 12            | 85.8       | 143        | 95.1        | 89.5          | 15.94     |
| SiO <sub>2</sub>     | 2             | 10         | 15         | 12.5        | 12.5          | 3.54      |
| pH                   | 12            | 7.26       | 8          | 7.64        | 7.62          | 0.23      |
| TDS                  | 12            | 515        | 803        | 578         | 557           | 74.2      |
| EC                   | 12            | 617        | 907        | 668         | 641           | 80.2      |
| <b>Well #6 (ARA)</b> |               |            |            |             |               |           |
| <i>Parameter</i>     | <i>N. Obs</i> | <i>Min</i> | <i>Max</i> | <i>Mean</i> | <i>Median</i> | <i>SD</i> |
| HCO <sub>3</sub>     | 11            | 169        | 298        | 261         | 266           | 35.1      |
| Cl                   | 11            | 18.4       | 65         | 40.3        | 38.2          | 12.8      |
| NO <sub>3</sub>      | 11            | 5          | 28         | 12.2        | 9.7           | 8.05      |
| SO <sub>4</sub>      | 11            | 66.7       | 97         | 80.3        | 76.9          | 10.7      |
| Na                   | 11            | 24.8       | 44         | 32.5        | 30.5          | 6.14      |
| K                    | 11            | 2.11       | 3.7        | 2.68        | 2.6           | 0.5       |
| Mg                   | 11            | 15         | 19.1       | 16.8        | 17            | 1.38      |
| Ca                   | 11            | 68         | 97.8       | 85.9        | 85.7          | 9.17      |
| SiO <sub>2</sub>     | 1             | 11         | 11         | -           | -             | -         |
| pH                   | 11            | 7.4        | 8.11       | 7.69        | 7.59          | 0.23      |
| TDS                  | 11            | 437        | 593        | 532         | 529           | 46.9      |

|                       |               |            |            |             |               |           |
|-----------------------|---------------|------------|------------|-------------|---------------|-----------|
| EC                    | 11            | 517        | 710        | 617         | 627           | 60        |
| <b>Well #7 (ARA)</b>  |               |            |            |             |               |           |
| <i>Parameter</i>      | <i>N. Obs</i> | <i>Min</i> | <i>Max</i> | <i>Mean</i> | <i>Median</i> | <i>SD</i> |
| HCO <sub>3</sub>      | 12            | 175        | 329        | 277         | 278           | 41.7      |
| Cl                    | 12            | 29         | 68         | 42.7        | 40.5          | 12        |
| NO <sub>3</sub>       | 11            | 6          | 55.7       | 23.2        | 15.2          | 19.3      |
| SO <sub>4</sub>       | 12            | 67.8       | 104        | 82.8        | 79.8          | 9.94      |
| Na                    | 12            | 25.6       | 51         | 32.8        | 30.8          | 7.01      |
| K                     | 12            | 1.9        | 3.8        | 2.7         | 2.6           | 0.52      |
| Mg                    | 12            | 14.4       | 20.7       | 17.9        | 18.1          | 1.95      |
| Ca                    | 12            | 78         | 120        | 95.6        | 94.9          | 12.5      |
| SiO <sub>2</sub>      | 2             | 7          | 11         | 9           | 9             | 2.83      |
| pH                    | 12            | 7          | 8.11       | 7.6         | 7.59          | 0.31      |
| TDS                   | 12            | 493        | 668        | 572         | 566           | 61.5      |
| EC                    | 12            | 556        | 752        | 660         | 663           | 63.6      |
| <b>Well #8 (ARA)</b>  |               |            |            |             |               |           |
| <i>Parameter</i>      | <i>N. Obs</i> | <i>Min</i> | <i>Max</i> | <i>Mean</i> | <i>Median</i> | <i>SD</i> |
| HCO <sub>3</sub>      | 12            | 123        | 320        | 270         | 278           | 50.4      |
| Cl                    | 12            | 32.5       | 57         | 44.2        | 43.1          | 8.65      |
| NO <sub>3</sub>       | 12            | 5          | 45.4       | 20.3        | 13.5          | 14.91     |
| NO <sub>2</sub>       | 8             | 0.01       | 0.01       | 0.01        | 0.01          | 0         |
| SO <sub>4</sub>       | 12            | 73.4       | 98         | 82          | 81.2          | 6.43      |
| Na                    | 12            | 28.1       | 48         | 33.2        | 32            | 5.2       |
| K                     | 12            | 2.09       | 3.2        | 2.69        | 2.75          | 0.35      |
| Mg                    | 12            | 14.2       | 19.5       | 17.1        | 17            | 1.52      |
| Ca                    | 12            | 60         | 109        | 92.2        | 93.1          | 13.2      |
| SiO <sub>2</sub>      | 2             | 5          | 11         | 8           | 8             | 4.24      |
| pH                    | 12            | 7          | 8          | 7.59        | 7.61          | 0.29      |
| TDS                   | 12            | 410        | 648        | 561         | 561           | 64.6      |
| EC                    | 12            | 521        | 731        | 651         | 658           | 62        |
| <b>Well #9 (ARA)</b>  |               |            |            |             |               |           |
| <i>Parameter</i>      | <i>N. Obs</i> | <i>Min</i> | <i>Max</i> | <i>Mean</i> | <i>Median</i> | <i>SD</i> |
| HCO <sub>3</sub>      | 12            | 206        | 320        | 268.56      | 267.6         | 28.06     |
| Cl                    | 12            | 29.4       | 62         | 44.65       | 42.35         | 11.01     |
| NO <sub>3</sub>       | 12            | 5          | 31.7       | 12.8        | 10.7          | 7.83      |
| SO <sub>4</sub>       | 12            | 70.7       | 98         | 81.99       | 81.35         | 7.15      |
| Na                    | 12            | 27.3       | 48         | 33.45       | 32.25         | 5.38      |
| K                     | 12            | 2.1        | 3.1        | 2.73        | 2.75          | 0.33      |
| Mg                    | 12            | 14.47      | 18.5       | 16.99       | 17.25         | 1.27      |
| Ca                    | 12            | 78.34      | 104        | 91.84       | 91.25         | 7.34      |
| SiO <sub>2</sub>      | 2             | 8          | 11         | 9.5         | 9.5           | 2.12      |
| pH                    | 12            | 7.39       | 8          | 7.71        | 7.72          | 0.2       |
| TDS                   | 12            | 506        | 622.5      | 553.02      | 546.5         | 33.82     |
| EC                    | 12            | 581        | 699        | 643.75      | 653           | 38.44     |
| <b>Well #10 (ARA)</b> |               |            |            |             |               |           |
| <i>Parameter</i>      | <i>N. Obs</i> | <i>Min</i> | <i>Max</i> | <i>Mean</i> | <i>Median</i> | <i>SD</i> |
| HCO <sub>3</sub>      | 12            | 170        | 305        | 266         | 268           | 32.9      |
| Cl                    | 12            | 30.3       | 60         | 44.4        | 42.4          | 9.9       |
| NO <sub>3</sub>       | 12            | 6          | 21         | 12.7        | 11.5          | 5.64      |
| SO <sub>4</sub>       | 12            | 69.2       | 97         | 80.1        | 79.7          | 7.17      |
| Na                    | 12            | 27.7       | 47         | 33.8        | 32.7          | 4.84      |
| K                     | 12            | 2.3        | 3.2        | 2.85        | 2.9           | 0.23      |
| Mg                    | 12            | 14.5       | 19         | 17.3        | 17.6          | 1.25      |
| Ca                    | 12            | 78         | 114        | 90.8        | 88.9          | 10        |

|                                                |               |            |            |             |               |           |
|------------------------------------------------|---------------|------------|------------|-------------|---------------|-----------|
| SiO <sub>2</sub>                               | 2             | 9          | 12         | 10.5        | 10.5          | 2.12      |
| pH                                             | 12            | 7          | 8.21       | 7.61        | 7.62          | 0.3       |
| TDS                                            | 12            | 479        | 599        | 548         | 553           | 34.9      |
| EC                                             | 12            | 584        | 721        | 639         | 649           | 40.6      |
| <b>Well #11 (AP - urban area)</b>              |               |            |            |             |               |           |
| <i>Parameter</i>                               | <i>N. Obs</i> | <i>Min</i> | <i>Max</i> | <i>Mean</i> | <i>Median</i> | <i>SD</i> |
| HCO <sub>3</sub>                               | 7             | 390        | 434        | 416         | 416           | 15.2      |
| Cl                                             | 7             | 90         | 101        | 93.7        | 92.3          | 3.57      |
| NO <sub>3</sub>                                | 7             | 55         | 79.7       | 67.2        | 64.8          | 8.84      |
| SO <sub>4</sub>                                | 7             | 97         | 110        | 102         | 100           | 5.07      |
| Na                                             | 7             | 62.3       | 73.3       | 65.8        | 65            | 3.7       |
| K                                              | 7             | 4.1        | 4.8        | 4.31        | 4.29          | 0.23      |
| Mg                                             | 7             | 27.2       | 32.2       | 29.4        | 29            | 1.94      |
| Ca                                             | 7             | 132        | 172        | 154         | 151           | 14.49     |
| SiO <sub>2</sub>                               | 1             | 16         | 16         | -           | -             | -         |
| pH                                             | 7             | 7          | 7.33       | 7.2         | 7.26          | 0.12      |
| TDS                                            | 7             | 892        | 955        | 932         | 930           | 21.64     |
| EC                                             | 7             | 1053       | 1098       | 1074        | 1079          | 17.45     |
| <b>Well #12 (AP - urban area)</b>              |               |            |            |             |               |           |
| <i>Parameter</i>                               | <i>N. Obs</i> | <i>Min</i> | <i>Max</i> | <i>Mean</i> | <i>Median</i> | <i>SD</i> |
| HCO <sub>3</sub>                               | 7             | 384        | 427        | 411         | 415           | 14.2      |
| Cl                                             | 7             | 119        | 180        | 155         | 153           | 20.4      |
| NO <sub>3</sub>                                | 7             | 49         | 58         | 52.9        | 52.7          | 2.86      |
| SO <sub>4</sub>                                | 7             | 54.5       | 101        | 80          | 79.6          | 13.7      |
| Na                                             | 7             | 81.6       | 99.3       | 90.5        | 92.3          | 6.59      |
| K                                              | 7             | 3.79       | 4.1        | 3.96        | 4             | 0.1       |
| Mg                                             | 7             | 29.7       | 38         | 32.12       | 31.4          | 2.71      |
| Ca                                             | 7             | 105        | 171        | 136         | 131           | 22.6      |
| SiO <sub>2</sub>                               | 2             | 15         | 18         | 16.5        | 16.5          | 2.12      |
| pH                                             | 7             | 7          | 7.41       | 7.2         | 7.18          | 0.14      |
| TDS                                            | 7             | 936        | 1004       | 961         | 953           | 27.1      |
| EC                                             | 7             | 1134       | 1269       | 1184        | 1185          | 44.4      |
| <b>Well #13 (AP - industrial-central area)</b> |               |            |            |             |               |           |
| <i>Parameter</i>                               | <i>N. Obs</i> | <i>Min</i> | <i>Max</i> | <i>Mean</i> | <i>Median</i> | <i>SD</i> |
| HCO <sub>3</sub>                               | 2             | 239        | 422        | 331         | 331           | 130       |
| Cl                                             | 2             | 84.3       | 157        | 121         | 121           | 51.4      |
| NO <sub>3</sub>                                | 2             | 4.82       | 7.6        | 6.21        | 6.21          | 1.97      |
| SO <sub>4</sub>                                | 2             | 96.4       | 101        | 98.7        | 98.7          | 3.27      |
| Na                                             | 2             | 43.4       | 91.1       | 67.3        | 67.3          | 33.7      |
| K                                              | 2             | 2.25       | 3.6        | 2.92        | 2.92          | 0.95      |
| Mg                                             | 2             | 17.1       | 39.6       | 28.3        | 28.3          | 16        |
| Ca                                             | 2             | 88.7       | 172        | 130         | 130           | 58.9      |
| SiO <sub>2</sub>                               | 1             | 10         | 10         | -           | -             | -         |
| pH                                             | 2             | 7.09       | 7.65       | 7.37        | 7.37          | 0.4       |
| TDS                                            | 2             | 576        | 994        | 785         | 785           | 296       |
| EC                                             | 2             | 743        | 1257       | 1000        | 1000          | 363       |
| <b>ell #14 (AP - coastal area)</b>             |               |            |            |             |               |           |
| <i>Parameter</i>                               | <i>N. Obs</i> | <i>Min</i> | <i>Max</i> | <i>Mean</i> | <i>Median</i> | <i>SD</i> |
| HCO <sub>3</sub>                               | 4             | 374        | 435        | 405         | 407           | 30        |
| Cl                                             | 4             | 93         | 270        | 175         | 168           | 77.9      |
| NO <sub>3</sub>                                | 4             | 25         | 135        | 85.1        | 90            | 45.5      |
| NO <sub>2</sub>                                | 1             | 0.42       | 0.42       | -           | -             | -         |
| SO <sub>4</sub>                                | 4             | 94         | 156        | 134         | 143           | 28.7      |
| Na                                             | 4             | 63.8       | 175        | 109         | 98.5          | 47.6      |

|                                         |        |      |       |      |        |       |
|-----------------------------------------|--------|------|-------|------|--------|-------|
| NH <sub>4</sub>                         | 1      | 0.82 | 0.82  | -    | -      | -     |
| K                                       | 4      | 7.73 | 10.4  | 8.98 | 8.89   | 1.11  |
| Mg                                      | 4      | 31.3 | 39    | 33.9 | 32.7   | 3.54  |
| Ca                                      | 4      | 153  | 178   | 164  | 163    | 10.4  |
| SiO <sub>2</sub>                        | 2      | 13   | 15    | 14   | 14     | 1.41  |
| pH                                      | 4      | 7.14 | 7.8   | 7.45 | 7.42   | 0.29  |
| TDS                                     | 4      | 1027 | 1285  | 1116 | 1076   | 119   |
| EC                                      | 4      | 1248 | 1540  | 1389 | 1384   | 162   |
| Well #15 (AP - Inland area)             |        |      |       |      |        |       |
| Parameter                               | N. Obs | Min  | Max   | Mean | Median | SD    |
| HCO <sub>3</sub>                        | 8      | 374  | 425   | 398  | 400    | 20.3  |
| Cl                                      | 8      | 59.4 | 103   | 76.6 | 76.5   | 15.7  |
| NO <sub>3</sub>                         | 8      | 65   | 87.8  | 74.6 | 73.9   | 8.55  |
| SO <sub>4</sub>                         | 8      | 70   | 101   | 77.6 | 73.3   | 10.5  |
| Na                                      | 8      | 45   | 62.6  | 51.5 | 49     | 6.94  |
| K                                       | 8      | 1.8  | 3     | 2.21 | 2.05   | 0.41  |
| Mg                                      | 8      | 27.4 | 36    | 33.5 | 34.5   | 3.03  |
| Ca                                      | 8      | 113  | 164   | 131  | 128    | 16.3  |
| SiO <sub>2</sub>                        | 2      | 12   | 15    | 13.5 | 13.5   | 2.12  |
| pH                                      | 8      | 7.11 | 7.5   | 7.28 | 7.28   | 0.14  |
| TDS                                     | 8      | 785  | 917   | 844  | 845    | 45.1  |
| EC                                      | 8      | 908  | 1164  | 983  | 949    | 89    |
| Well #16 (AP - Inland area)             |        |      |       |      |        |       |
| Parameter                               | N. Obs | Min  | Max   | Mean | Median | SD    |
| HCO <sub>3</sub>                        | 8      | 225  | 424   | 382  | 416    | 71.6  |
| Cl                                      | 8      | 48   | 62.9  | 57.5 | 58     | 4.78  |
| NO <sub>3</sub>                         | 8      | 13   | 95    | 81.6 | 91.6   | 27.9  |
| NO <sub>2</sub>                         | 4      | 0.01 | 0.01  | 0.01 | 0.01   | 0     |
| SO <sub>4</sub>                         | 8      | 86   | 112.4 | 106  | 110    | 9.81  |
| Na                                      | 8      | 34   | 49.4  | 45.9 | 48     | 5.07  |
| K                                       | 8      | 3.1  | 4.39  | 3.45 | 3.35   | 0.4   |
| Mg                                      | 8      | 18   | 43.4  | 38.4 | 42     | 8.71  |
| Ca                                      | 8      | 84   | 148   | 125  | 135    | 24.17 |
| SiO <sub>2</sub>                        | 1      | 13   | 13    | -    | -      | -     |
| pH                                      | 8      | 7.27 | 7.83  | 7.49 | 7.44   | 0.2   |
| TDS                                     | 8      | 511  | 926   | 840  | 907    | 145   |
| EC                                      | 8      | 603  | 1048  | 953  | 1011   | 149   |
| Well #17 (AP - industrial-central area) |        |      |       |      |        |       |
| Parameter                               | N. Obs | Min  | Max   | Mean | Median | SD    |
| HCO <sub>3</sub>                        | 8      | 217  | 377   | 340  | 355    | 51.4  |
| Cl                                      | 8      | 52   | 65.1  | 60.6 | 61.1   | 4.1   |
| NO <sub>3</sub>                         | 8      | 11   | 100   | 76.9 | 83.1   | 28.2  |
| NO <sub>2</sub>                         | 4      | 0.01 | 0.01  | 0.01 | 0.01   | 0     |
| SO <sub>4</sub>                         | 8      | 83   | 106   | 96.6 | 98.5   | 7.77  |
| Na                                      | 8      | 35   | 45    | 40.2 | 40.5   | 2.96  |
| NH <sub>4</sub>                         | 4      | 0.01 | 0.01  | 0.01 | 0.01   | 0     |
| K                                       | 8      | 2.4  | 3.4   | 2.72 | 2.63   | 0.33  |
| Mg                                      | 8      | 18   | 27.4  | 23.2 | 24.8   | 3.21  |
| Ca                                      | 8      | 86   | 165   | 137  | 144    | 25.9  |
| SiO <sub>2</sub>                        | 2      | 14   | 18    | 16   | 16     | 2.83  |
| pH                                      | 8      | 7.1  | 7.94  | 7.39 | 7.3    | 0.25  |
| TDS                                     | 8      | 511  | 859   | 778  | 814    | 113   |
| EC                                      | 8      | 613  | 974   | 893  | 927    | 116   |
| Well #18 (AP - industrial-central area) |        |      |       |      |        |       |

| <i>Parameter</i>                               | <i>N. Obs</i> | <i>Min</i> | <i>Max</i> | <i>Mean</i> | <i>Median</i> | <i>SD</i> |
|------------------------------------------------|---------------|------------|------------|-------------|---------------|-----------|
| HCO <sub>3</sub>                               | 4             | 417        | 508        | 471         | 479           | 38.6      |
| Cl                                             | 4             | 52.4       | 107        | 74.8        | 69.9          | 26.4      |
| NO <sub>3</sub>                                | 4             | 22.5       | 67.5       | 40.3        | 35.5          | 21.6      |
| SO <sub>4</sub>                                | 4             | 67.5       | 183        | 119         | 113           | 47.5      |
| Na                                             | 4             | 58.7       | 86.9       | 67.8        | 62.7          | 13.1      |
| K                                              | 4             | 3.5        | 4.15       | 3.78        | 3.74          | 0.33      |
| Mg                                             | 4             | 34         | 41.6       | 36.7        | 35.7          | 3.54      |
| Ca                                             | 4             | 118        | 146        | 128         | 123           | 12.8      |
| SiO <sub>2</sub>                               | 2             | 16         | 18         | 17          | 17            | 1.41      |
| pH                                             | 4             | 7.16       | 7.32       | 7.22        | 7.19          | 0.07      |
| TDS                                            | 4             | 889        | 994        | 941         | 939           | 47.6      |
| EC                                             | 4             | 973        | 1320       | 1112        | 1078          | 160       |
| <b>Well #19 (AP - industrial-central area)</b> |               |            |            |             |               |           |
| <i>Parameter</i>                               | <i>N. Obs</i> | <i>Min</i> | <i>Max</i> | <i>Mean</i> | <i>Median</i> | <i>SD</i> |
| HCO <sub>3</sub>                               | 7             | 354        | 376        | 363         | 361           | 7.05      |
| Cl                                             | 7             | 61         | 69.5       | 65          | 64.7          | 3.54      |
| NO <sub>3</sub>                                | 7             | 79         | 113        | 94.4        | 95            | 13.6      |
| SO <sub>4</sub>                                | 7             | 77.3       | 96.5       | 90.1        | 94.5          | 8.27      |
| Na                                             | 7             | 37.5       | 45.8       | 41.9        | 42            | 2.68      |
| K                                              | 7             | 2.22       | 2.8        | 2.5         | 2.46          | 0.21      |
| Mg                                             | 7             | 18.8       | 25.3       | 22.07       | 22.7          | 2.37      |
| Ca                                             | 7             | 120        | 167        | 144         | 148           | 17        |
| SiO <sub>2</sub>                               | 2             | 16         | 18         | 17          | 17            | 1.41      |
| pH                                             | 7             | 7.17       | 7.43       | 7.3         | 7.3           | 0.11      |
| TDS                                            | 7             | 753        | 877        | 823         | 831           | 43.2      |
| EC                                             | 7             | 896        | 998        | 953         | 970           | 41.7      |
| <b>Well #20 (AP - industrial-central area)</b> |               |            |            |             |               |           |
| <i>Parameter</i>                               | <i>N. Obs</i> | <i>Min</i> | <i>Max</i> | <i>Mean</i> | <i>Median</i> | <i>SD</i> |
| HCO <sub>3</sub>                               | 8             | 404        | 425        | 412         | 411           | 6.83      |
| Cl                                             | 8             | 81.8       | 92.8       | 88.1        | 88.3          | 4.08      |
| NO <sub>3</sub>                                | 8             | 89         | 119        | 101         | 99.7          | 12.7      |
| SO <sub>4</sub>                                | 8             | 106        | 123        | 114         | 113           | 5.47      |
| Na                                             | 8             | 59.2       | 66.4       | 62.3        | 62            | 2.49      |
| K                                              | 8             | 2.84       | 3.6        | 3.28        | 3.3           | 0.21      |
| Mg                                             | 8             | 35         | 41.2       | 37.9        | 38.4          | 2         |
| Ca                                             | 8             | 124        | 160        | 145         | 148           | 13.2      |
| SiO <sub>2</sub>                               | 2             | 16         | 18         | 17          | 17            | 1.41      |
| pH                                             | 8             | 7          | 7.53       | 7.23        | 7.27          | 0.16      |
| TDS                                            | 8             | 948        | 990        | 963         | 959           | 15.2      |
| EC                                             | 8             | 1095       | 1147       | 1113        | 1111          | 17.3      |
| <b>Well #21 (AP - coastal area)</b>            |               |            |            |             |               |           |
| <i>Parameter</i>                               | <i>N. Obs</i> | <i>Min</i> | <i>Max</i> | <i>Mean</i> | <i>Median</i> | <i>SD</i> |
| HCO <sub>3</sub>                               | 10            | 386        | 473        | 430         | 433           | 30.3      |
| Cl                                             | 10            | 108        | 132        | 119         | 121           | 6.71      |
| NO <sub>3</sub>                                | 10            | 51         | 123        | 72.5        | 63.7          | 24.2      |
| SO <sub>4</sub>                                | 10            | 101        | 140        | 121         | 124           | 12.8      |
| Na                                             | 10            | 76         | 120        | 102         | 107           | 14.9      |
| K                                              | 6             | 0.01       | 0.18       | 0.04        | 0.01          | 0.07      |
| NH <sub>4</sub>                                | 10            | 2.16       | 4.3        | 3.63        | 3.75          | 0.65      |
| Mg                                             | 10            | 30         | 35         | 32.03       | 31.42         | 1.65      |
| Ca                                             | 10            | 94.7       | 157        | 137         | 142           | 16.8      |
| SiO <sub>2</sub>                               | 2             | 9          | 15         | 12          | 12            | 4.24      |
| pH                                             | 10            | 7.1        | 7.44       | 7.31        | 7.38          | 0.14      |
| TDS                                            | 10            | 954        | 1095       | 1018        | 1010          | 42.4      |

|                                     |               |            |            |             |               |           |
|-------------------------------------|---------------|------------|------------|-------------|---------------|-----------|
| EC                                  | 10            | 1123       | 1259       | 1195        | 1217          | 54.1      |
| <b>Well #22 (AP - coastal area)</b> |               |            |            |             |               |           |
| <i>Parameter</i>                    | <i>N. Obs</i> | <i>Min</i> | <i>Max</i> | <i>Mean</i> | <i>Median</i> | <i>SD</i> |
| HCO <sub>3</sub>                    | 10            | 378        | 573        | 459         | 448           | 55.6      |
| Cl                                  | 10            | 45.9       | 211        | 104         | 86.8          | 56        |
| NO <sub>3</sub>                     | 10            | 16         | 180        | 67.1        | 58            | 42.9      |
| SO <sub>4</sub>                     | 10            | 73.9       | 192        | 125         | 112           | 42.3      |
| Na                                  | 10            | 50.8       | 228        | 100         | 75.1          | 59.5      |
| NH <sub>4</sub>                     | 6             | 0.01       | 0.08       | 0.02        | 0.01          | 0.03      |
| K                                   | 10            | 2.7        | 15         | 5.88        | 4.05          | 3.99      |
| Mg                                  | 10            | 23.4       | 44.7       | 32.73       | 31.7          | 6.62      |
| Ca                                  | 10            | 99.8       | 166        | 136.8       | 141           | 23        |
| SiO <sub>2</sub>                    | 2             | 9          | 12         | 10.5        | 10.5          | 2.12      |
| pH                                  | 10            | 7          | 7.52       | 7.32        | 7.34          | 0.13      |
| TDS                                 | 10            | 772        | 1374       | 1030        | 989           | 200       |
| EC                                  | 10            | 865        | 1685       | 1175        | 1118          | 269       |
| <b>Well #23 (AP - coastal area)</b> |               |            |            |             |               |           |
| <i>Parameter</i>                    | <i>N. Obs</i> | <i>Min</i> | <i>Max</i> | <i>Mean</i> | <i>Median</i> | <i>SD</i> |
| HCO <sub>3</sub>                    | 6             | 376        | 515        | 446         | 443           | 58.5      |
| Cl                                  | 6             | 76         | 233        | 159         | 164           | 58.2      |
| NO <sub>3</sub>                     | 6             | 38.7       | 130        | 76.4        | 67.2          | 37.5      |
| SO <sub>4</sub>                     | 6             | 115        | 148        | 134         | 136           | 12.8      |
| Na                                  | 6             | 57         | 199        | 125         | 118           | 59.9      |
| NH <sub>4</sub>                     | 3             | 0.01       | 1.45       | 0.49        | 0.01          | 0.83      |
| K                                   | 6             | 3.6        | 10.4       | 7.39        | 7.55          | 2.57      |
| Mg                                  | 6             | 22.2       | 32.9       | 28.6        | 28.8          | 4.04      |
| Ca                                  | 6             | 104        | 158        | 144         | 150           | 19.9      |
| SiO <sub>2</sub>                    | 2             | 11         | 14         | 12.5        | 12.5          | 2.12      |
| pH                                  | 6             | 7.15       | 7.64       | 7.39        | 7.4           | 0.2       |
| TDS                                 | 6             | 917        | 1299       | 1119        | 1115          | 150       |
| EC                                  | 6             | 1034       | 1704       | 1356        | 1350          | 242       |
| <b>Well #24 (AP - coastal area)</b> |               |            |            |             |               |           |
| <i>Parameter</i>                    | <i>N. Obs</i> | <i>Min</i> | <i>Max</i> | <i>Mean</i> | <i>Median</i> | <i>SD</i> |
| HCO <sub>3</sub>                    | 8             | 376        | 465        | 423         | 426           | 32.6      |
| Cl                                  | 8             | 52.7       | 86.9       | 70.7        | 70.1          | 12.2      |
| NO <sub>3</sub>                     | 8             | 60.7       | 111        | 79.3        | 75.2          | 19.7      |
| SO <sub>4</sub>                     | 8             | 102        | 182        | 126         | 119           | 24        |
| Na                                  | 8             | 56         | 64.7       | 59.7        | 58.4          | 3.25      |
| K                                   | 8             | 8.8        | 10.7       | 10          | 9.9           | 0.61      |
| Mg                                  | 8             | 26.5       | 36.3       | 31.3        | 31.1          | 2.88      |
| Ca                                  | 8             | 122        | 166        | 152         | 157           | 14        |
| SiO <sub>2</sub>                    | 2             | 10         | 15         | 12.5        | 12.5          | 3.54      |
| pH                                  | 8             | 7.1        | 8.03       | 7.38        | 7.33          | 0.28      |
| TDS                                 | 8             | 853        | 1113       | 953         | 937           | 77.5      |
| EC                                  | 8             | 965        | 1291       | 1090        | 1048          | 114.5     |
| <b>Well #25 (AP - coastal area)</b> |               |            |            |             |               |           |
| <i>Parameter</i>                    | <i>N. Obs</i> | <i>Min</i> | <i>Max</i> | <i>Mean</i> | <i>Median</i> | <i>SD</i> |
| HCO <sub>3</sub>                    | 7             | 368        | 471        | 421         | 426           | 30.7      |
| Cl                                  | 7             | 60.6       | 93         | 75.1        | 75.2          | 12.5      |
| NO <sub>3</sub>                     | 7             | 57.9       | 109        | 78.3        | 68.2          | 21.1      |
| SO <sub>4</sub>                     | 7             | 103        | 171        | 124         | 118           | 23        |
| Na                                  | 7             | 58         | 70.1       | 63.4        | 63.4          | 4.83      |
| NH <sub>4</sub>                     | 4             | 0.01       | 0.01       | 0.01        | 0.01          | 0         |

|                  |   |      |      |      |      |      |
|------------------|---|------|------|------|------|------|
| K                | 7 | 9.7  | 12.5 | 10.4 | 10   | 1    |
| Mg               | 7 | 29   | 37.2 | 31.5 | 30   | 2.93 |
| Ca               | 7 | 139  | 171  | 153  | 151  | 12.4 |
| SiO <sub>2</sub> | 2 | 9    | 17   | 13   | 13   | 5.66 |
| pH               | 7 | 7.1  | 7.97 | 7.42 | 7.3  | 0.33 |
| TDS              | 7 | 909  | 1129 | 957  | 928  | 77.5 |
| EC               | 7 | 1025 | 1291 | 1108 | 1053 | 97.6 |

**Well #26 (AP - Inland area)**

| <i>Parameter</i> | <i>N. Obs</i> | <i>Min</i> | <i>Max</i> | <i>Mean</i> | <i>Median</i> | <i>SD</i> |
|------------------|---------------|------------|------------|-------------|---------------|-----------|
| HCO <sub>3</sub> | 4             | 373        | 451        | 397         | 382           | 36.7      |
| Cl               | 4             | 39.5       | 64         | 52.4        | 53            | 11.9      |
| NO <sub>3</sub>  | 4             | 13.4       | 36.7       | 21.7        | 18.3          | 10.7      |
| NO <sub>2</sub>  | 1             | 0.01       | 0.01       | -           | -             | -         |
| SO <sub>4</sub>  | 4             | 60         | 91.8       | 73.9        | 71.8          | 14.8      |
| Na               | 4             | 24.5       | 42.4       | 32.9        | 32.3          | 7.54      |
| K                | 4             | 2.35       | 3.6        | 3.08        | 3.19          | 0.58      |
| Mg               | 4             | 14         | 21.1       | 16.7        | 15.9          | 3.09      |
| Ca               | 4             | 119        | 151        | 129         | 122           | 15.1      |
| SiO <sub>2</sub> | 2             | 12         | 12         | 12          | 12            | 0         |
| pH               | 4             | 7.27       | 7.57       | 7.44        | 7.47          | 0.14      |
| TDS              | 4             | 651        | 770        | 726         | 742           | 52        |
| EC               | 4             | 718        | 872        | 809         | 823           | 65        |

**Well #27 (AP - Industrial-central area)**

| <i>Parameter</i> | <i>N. Obs</i> | <i>Min</i> | <i>Max</i> | <i>Mean</i> | <i>Median</i> | <i>SD</i> |
|------------------|---------------|------------|------------|-------------|---------------|-----------|
| HCO <sub>3</sub> | 9             | 417        | 437        | 429         | 432           | 6.97      |
| Cl               | 9             | 56.1       | 67.6       | 62.3        | 62.4          | 3.85      |
| NO <sub>3</sub>  | 9             | 92         | 112        | 100         | 97.9          | 6.39      |
| SO <sub>4</sub>  | 9             | 101        | 118        | 110         | 112           | 4.92      |
| Na               | 9             | 43.7       | 49.3       | 46.6        | 46.9          | 1.91      |
| K                | 9             | 3.05       | 3.6        | 3.35        | 3.4           | 0.16      |
| Mg               | 9             | 36.7       | 44.4       | 41.6        | 42.8          | 2.48      |
| Ca               | 9             | 122        | 159        | 141         | 144           | 13.5      |
| SiO <sub>2</sub> | 2             | 15         | 19         | 17          | 17            | 2.83      |
| pH               | 9             | 7          | 7.91       | 7.37        | 7.38          | 0.27      |
| TDS              | 9             | 903        | 960        | 934         | 937           | 22        |
| EC               | 9             | 1032       | 1085       | 1056        | 1056          | 19        |



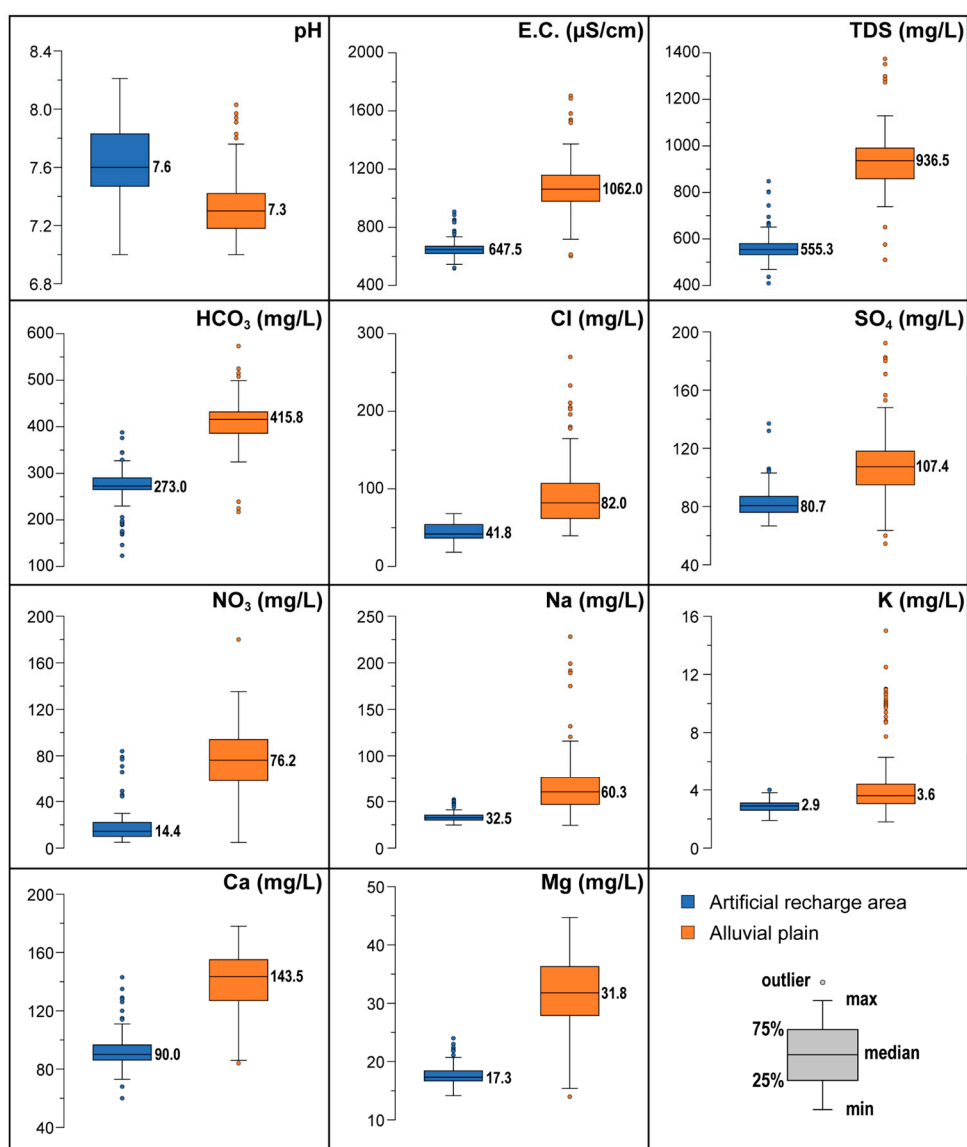

**Figure S1.** Box-plots of the main physicochemical parameters and main ions divided into Artificial Recharge Area (ARA) and Alluvial Plain (AP) samples, respectively.

**Table S2:** nitrate content statistical parameters for each investigated well

| <i>Nitrates (mg/L)</i> |                 |               |            |            |             |               |           |
|------------------------|-----------------|---------------|------------|------------|-------------|---------------|-----------|
| <i>Well ID</i>         | <i>Timespan</i> | <i>N. Obs</i> | <i>Min</i> | <i>Max</i> | <i>Mean</i> | <i>Median</i> | <i>SD</i> |
| 1                      | 2009-2020       | 92            | 2          | 75         | 22.5        | 18.4          | 15.8      |
| 2                      | 2009-2020       | 93            | 2.7        | 83.5       | 22.9        | 16.1          | 20        |
| 3                      | 2009-2020       | 94            | 1          | 79         | 26.3        | 20.3          | 19.9      |
| 4                      | 2009-2020       | 93            | 4.8        | 84         | 18.6        | 15            | 13.1      |
| 5                      | 2009-2020       | 93            | 4.8        | 77         | 18.9        | 15.4          | 13.1      |
| 6                      | 2009-2020       | 92            | 3          | 65.7       | 19.3        | 14.2          | 15.6      |
| 7                      | 2009-2020       | 93            | 0.6        | 89.3       | 28.8        | 19.2          | 24.1      |
| 8                      | 2009-2020       | 93            | 4          | 79.2       | 28.4        | 20            | 21.7      |
| 9                      | 2009-2020       | 92            | 4          | 57         | 18.5        | 12.8          | 13.9      |
| 10                     | 2009-2020       | 93            | 4          | 79.2       | 15.7        | 13.7          | 9.74      |
| 11                     | 2009-2020       | 30            | 14         | 97         | 67.8        | 67            | 16.2      |
| 12                     | 2009-2019       | 41            | 12         | 92         | 56.2        | 54.5          | 10.6      |
| 13                     | 2009-2019       | 5             | 4.82       | 86         | 53.3        | 82            | 43        |
| 14                     | 2009-2020       | 9             | 25         | 135        | 83          | 86            | 29.3      |
| 15                     | 2009-2020       | 36            | 61         | 104        | 82.7        | 84.4          | 13.5      |
| 16                     | 2009-2020       | 34            | 10.2       | 109        | 90.8        | 94            | 21.3      |
| 17                     | 2008-2020       | 17            | 11         | 104        | 80.9        | 84.2          | 22        |
| 18                     | 2009-2016       | 26            | 22.3       | 97         | 49.2        | 49.3          | 23.8      |
| 19                     | 2008-2020       | 38            | 19         | 121        | 94.8        | 100           | 17.5      |
| 20                     | 2008-2020       | 55            | 20         | 122        | 95.1        | 102           | 20.9      |
| 21                     | 2009-2020       | 44            | 15         | 123        | 75          | 68.1          | 22        |
| 22                     | 2009-2020       | 46            | 8.7        | 180        | 60.4        | 58.7          | 32.1      |
| 23                     | 2009-2019       | 30            | 34.5       | 130        | 70.6        | 70.3          | 24.4      |
| 24                     | 2009-2020       | 44            | 16         | 111        | 77.7        | 82.3          | 15.4      |
| 25                     | 2009-2020       | 43            | 13         | 109        | 77.4        | 80            | 16.5      |
| 26                     | 2009-2020       | 36            | 45         | 121        | 101         | 102           | 12.9      |
| 27                     | 2009-2017       | 10            | 13.4       | 36.7       | 25          | 26            | 8.53      |
